# Supplementary material for: The NSL Chromatin-Modifying Complex Subunit KANSL2 Regulates Cancer Stem–like Properties in Glioblastoma That Contribute to Tumorigenesis
Source: Oxford University Press journal article supplement (doi:10.1158/0008-5472.can-15-3159), 2016-07-12
Supplement: 00085472can153159-sup-158361_2_supp_3527734_2892fl.docx [file 00085472can153159-sup-158361_2_supp_3527734_2892fl.docx]

**Supplementary Table S2. Primers sequences.**

| Primer | Sequence |
| --- | --- |
| Human KANSL2 Forward | TCCCAATGCTGCCCCAAAGCC |
| Human KANSL2 Reverse | GGTTCCTGCTCCCCATCACTCCA |
| Human POU5F1 Forward | GCTGGAGAAGGAGAAGCTGG |
| Human POU5F1 Reverse | GCTAAGCTGCAGAGCCTCAA |
| Human NANOG Forward | AGGTCCCGGTCAAGAAACAG |
| Human NANOG Reverse | GTAGGAAGAGTAAAGGCTGGGG |
| Human CD133 Forward | ACAACACTACCAAGGACAAGG |
| Human CD133 Reverse | GGACTTAATCTCATCAAGAACAGG |
| Human KAT8 Forward | CTTGTCTACCCACTCGTCCAG |
| Human KAT8 Reverse | CGGAGAAACGTACCTGTGCC |
| Human NESTIN Forward | AGGAAAAGACCATCTGCCCG |
| Human NESTIN Reverse | AGTAGGCTCCTTTGCCACAC |
| Human GFAP Forward | AGGAAGATTGAGTCGCTGGAG |
| Human GFAP Reverse | CGGTGAGGTCTGGCTTGG |
| Human TUBB3 Forward | CAACAGCACGGCCATCCAGG |
| Human TUBB3 Reverse | CTTGGGGCCCTGGGCCTCCGA |
| Human RPL19 Forward | CAATGCCAACTCCCGTCAGCAGATC |
| Human RPL19 Reverse | GTGTTTTTCCGGCATCGAGCCC |
| Human GAPDH Forward | ACAGCCTCAAGATCATCAG |
| Human GAPDH Reverse | GAGTCCTTCCACGATACC |
| Rat Kansl2 Forward | TTCCTGTTCGTTCACTCACCGCC |
| Rat Kansl2 Reverse | AGGGTTTCACCCATAGGGCCTG |
| Rat Sox2 Forward | CAGGAGTTGTCAAGGCAGAGAAGAG |
| Rat Sox2 Reverse | GCCGCCGCGATTGTTGTGAT |
| Rat Pou5f1 Forward | GACCGCCCCAATGCCGTGAA |
| Rat Pou5f1 Reverse | ACCTTTCCAAAGAGAACGCCCAGG |
| Rat Nestin Forward | TAAGTTCCAGCTGGCTGTGG |
| Rat Nestin Reverse | GGGCTCTCACCTCTGCATTT |
| Rat Rpl19 Forward | ATGTATCACAGCCTGTACCTG |
| Rat Rpl19 Reverse | TTCTTGGTCTCTTCCTCCTTG |
