# Supplementary material for: The NSL Chromatin-Modifying Complex Subunit KANSL2 Regulates Cancer Stem–like Properties in Glioblastoma That Contribute to Tumorigenesis
Source: Oxford University Press journal article supplement (doi:10.1158/0008-5472.can-15-3159), 2016-07-12
Supplement: 00085472can153159-sup-158361_2_supp_3527736_5892fl.docx [file 00085472can153159-sup-158361_2_supp_3527736_5892fl.docx]

**Supplementary Table S3.** shRNA target sequences, target region and construct number.

| ID | Gene | Target Sequence | Target Region | Construct |
| --- | --- | --- | --- | --- |
| KD-K2-1 | KANSL2 | AGATACTGATGGCCCTAATAT | 3´UTR | TRCN0000434815 |
| KD-K2-2 | KANSL2 | ACAGTGAAGCTGATAGCATAG | CDS | TRCN0000435099 |
| KD- POU5F1-1 | POU5F1 | AGCGATCAAGCAGCGACTATG | CDS | TRCN0000235523 |
| KD- POU5F1-2 | POU5F1 | AGCGAACCAGTATCGAGAACC | CDS | TRCN0000235524 |
